# Supplementary material for: High throughput screening for the design of protein binding polymers
Source: Royal Society of Chemistry journal article supplement (doi:10.1039/d5sc04391c), 2025-01-01
Supplement: d5sc04391c1.xlsx [file d5sc04391c1.xlsx]

## Sheet: figure 2
		GOx [uM]	0.25		0.5		1			0.5		0.5		0.1
		eq.	16		16		16			16		32		146
POLYMER NAME			FRET	Error	FRET	Error	FRET	Error		FRET	Error	FRET	Error	FRET	Error
H95-co-M5			0.161	0.06	0.293	0.05	0.242229	0.0307898		0.293	0.05	0.256	0	0.157051	0.0343313
H95-co-F5			0.172	0.01	0.318	0.09	0.277008	0.0461325		0.318	0.09	0.24	0.09	0.176837	0.0426453
H95-co-X5			0.152	0.03	0.273	0.01	0.247607	0.0176691		0.273	0.01	0.244	0.03	0.174188	0.06521
H95-co-A5			0.164	0.01	0.272	0.04	0.24447	0.0831125		0.272	0.04	0.236	0.07	0.162902	0.00310186
A95-co-M5			0.175	0.01	0.275	0.07	0.246038	0.0407367		0.275	0.07	0.22	0.04	0.156114	0.0487922
A95-co-F5			0.168	0.04	0.356	0.03	0.254151	0.0107564		0.356	0.03	0.235	0.03	0.186701	0.0130441
A95-co-X5			0.148	0.03	0.245	0	0.23169	0.0770746		0.245	0	0.223	0.07	0.168113	0.00448748
A95-co-H5			0.159	0.03	0.245	0.09	0.262773	0.0305207		0.245	0.09	0.222	0.03	0.161555	0.0687194
H90-co-M10			0.158	0.02	0.302	0.01	0.258894	0.0146533		0.302	0.01	0.246	0.03	0.177594	0.0837697
H90-co-F10			0.2	0.07	0.512	0.05	0.331668	0.0364294		0.512	0.05	0.293	0.05	0.325586	0.0475048
H90-co-X10			0.16	0.01	0.286	0.01	0.261445	0.0342979		0.286	0.01	0.248	0.09	0.187057	0.000709619
H90-co-A10			0.154	0.01	0.267	0.06	0.250339	0.00403787		0.267	0.06	0.241	0.01	0.191983	0.0765856
A90-co-M10			0.156	0.03	0.249	0.03	0.246259	0.0155612		0.249	0.03	0.225	0.04	0.164342	0.0241709
A90-co-F10			0.181	0.06	0.521	0.01	0.35255	0.0544513		0.521	0.01	0.266	0.03	0.366205	0.0109607
A90-co-X10			0.158	0.05	0.24	0.04	0.253903	0.0455317		0.24	0.04	#N/A	0.11	0.17821	0.0239734
A90-co-H10			0.153	0.03	0.248	0.01	0.252166	0.0432245		0.248	0.01	0.232	0.01	#N/A	0.110134
H80-co-C20			0.164	0.02	0.299	0.05	0.259918	0.00146966		0.299	0.05	0.245	0.04	0.213568	0.0403086
H80-co-A20			0.16	0.03	#N/A	0.12	0.264329	0.021922		0.289	0.12	0.242	0.01	#N/A	0.12373
H80-co-Q20			0.22	0.07	0.465	0.04	0.376264	0.0979359		0.465	0.04	0.359	0.04	0.310592	0.0603323
H80-co-S20			0.159	0.02	0.256	0	0.255463	0.00933221		0.256	0	0.233	0.01	0.158891	0.0260882
A80-co-C20			0.162	0.01	0.239	0.06	0.251118	0.0102373		0.239	0.06	0.239	0.07	0.184075	0.00908498
A80-co-H20			0.146	0.03	0.255	0.05	0.263894	0.0265557		0.255	0.05	0.229	0.03	0.172722	0.0235115
A80-co-Q20			0.197	0	0.38	0.04	0.305725	0.030084		0.38	0.04	0.321	0.07	0.248076	0.0804981
A80-co-S20			0.14	0.03	0.216	0.05	0.2488	0.0152373		0.216	0.05	0.209	0.01	0.153943	0.0790603
H75-co-C20-co-M5			0.157	0.03	0.272	0.04	0.26969	0.00594872		0.272	0.04	0.254	0.07	0.195688	0.0405309
H75-co-C20-co-F5			0.159	0.03	0.27	0.01	0.274447	0.0224507		0.27	0.01	0.237	0.04	0.220844	0.0563891
H75-co-C20-co-X5			0.167	0.01	0.279	0.08	0.27135	0.00270434		0.279	0.08	0.246	0.02	0.227392	0.0153335
H75-co-C20-co-A5			0.164	0.01	0.247	0.04	0.255698	0.0190193		0.247	0.04	0.235	0.04	0.205221	0.070983
A75-co-C20-co-M5			0.155	0.07	0.234	0.04	0.251763	0.0515168		0.234	0.04	0.224	0.01	#N/A	0.136513
A75-co-C20-co-F5			0.153	0	0.306	0	0.290041	0.010247		0.306	0	0.235	0.08	0.243295	0.0253535
A75-co-C20-co-X5			0.142	0.02	0.236	0.02	0.260892	0.027329		0.236	0.02	0.228	0.01	0.19812	0.0726569
A75-co-C20-co-A5			0.159	0.06	0.239	0.02	0.279258	0.0644432		0.239	0.02	0.219	0.04	0.189072	0.0233373
H70-co-C20-co-M10			0.162	0.07	0.285	0.03	0.270854	0.0559763		0.285	0.03	0.253	0.05	0.203954	0.0767342
H70-co-C20-co-F10			0.195	0.05	0.471	0.04	0.331654	0.0130696		0.471	0.04	0.298	0.04	0.289122	0.0493935
H70-co-C20-co-X10			0.153	0.06	0.285	0.09	0.262751	0.031501		0.285	0.09	0.235	0.02	0.212239	0.0799779
H70-co-C20-co-A10			0.167	0.02	0.246	0.01	0.263231	0.00719122		0.246	0.01	0.249	0.08	0.206	0.000228621
A70-co-C20-co-M10			0.159	0.02	0.233	0.06	0.254461	0.004195		0.233	0.06	0.238	0.03	#N/A	0.144325
A70-co-C20-co-F10			0.213	0.04	0.471	0.03	0.344028	0.0704551		0.471	0.03	0.289	0.05	0.315487	0.0855531
A70-co-C20-co-X10			#N/A	0.24	0.233	0.05	0.254544	0.0844984		0.233	0.05	0.222	0	0.179276	0.0254231
A70-co-C20-co-A10			0.154	0.06	0.231	0.04	0.266837	0.0926586		0.231	0.04	0.208	0.05	0.191798	0.00520262
H60-co-C40			0.169	0.02	0.304	0.06	0.27357	0.00779435		0.304	0.06	0.247	0.01	#N/A	0.112903
H60-co-A40			0.163	0.04	0.314	0.05	0.27133	0.00794499		0.314	0.05	0.251	0.03	0.217414	0.0657496
H60-co-Q40			0.261	0.01	0.483	0.03	0.374966	0.0386209		0.483	0.03	0.359	0.01	0.394888	0.0861489
H60-co-S40			0.159	0.05	0.238	0.04	0.260025	0.0100288		0.238	0.04	0.234	0.03	0.195624	0.0536432
A60-co-C40			0.178	0.05	0.293	0.04	0.26297	0.060215		0.293	0.04	0.243	0.05	0.275127	0.0168096
A60-co-H40			0.161	0.01	0.269	0.03	0.269235	0.0303563		0.269	0.03	0.23	0.05	0.231485	0.0153441
A60-co-Q40			0.235	0.03	0.463	0.02	0.375918	0.0250814		0.463	0.02	0.35	0.03	0.358507	0.0504618
A60-co-S40			0.155	0.05	0.229	0.09	0.249987	0.0401912		0.229	0.09	0.198	0.01	0.154472	0.0707452
PEG113-b-H95-co-M5			#N/A	0.12	0.29	0.03	0.282222	0.017973		0.29	0.03	0.245	0.01	0.196884	0.065969
PEG113-b-H95-co-F5			0.179	0.04	0.294	0.03	0.256917	0.0331421		0.294	0.03	0.247	0.01	0.200516	0.11883
PEG113-b-H95-co-X5			0.187	0.06	0.302	0.1	0.269889	0.0306716		0.302	0.1	0.266	0.06	#N/A	0.115405
PEG113-b-H95-co-A5			0.17	0.01	0.279	0.01	0.254744	0.0158685		0.279	0.01	0.249	0	0.190384	0.0101655
PEG113-b-A95-co-M5			0.163	0.02	#N/A	0.11	0.261488	0.0110101		#N/A	0.11	0.243	0.01	0.177799	0.06275
PEG113-b-A95-co-F5			0.155	0.02	0.261	0.04	0.263033	0.00699675		0.261	0.04	0.237	0.03	0.186446	0.0570585
PEG113-b-A95-co-X5			0.163	0.07	0.249	0.09	0.290133	0.073338		0.249	0.09	0.242	0.03	#N/A	0.235858
A95-co-H5			0.161	0.02	0.241	0.05	0.251652	0.00888388		0.241	0.05	0.224	0.02	0.174176	0.0642742
PEG113-b-H90-co-M10			0.178	0.05	0.278	0.01	0.270559	0.00700242		0.278	0.01	0.233	0.05	0.189499	0.0306141
PEG113-b-H90-co-F10			0.174	0.03	0.284	0.02	0.267073	0.0137802		0.284	0.02	0.239	0.03	0.221851	0.0225886
PEG113-b-H90-co-X10			0.163	0.02	0.297	0.03	0.287295	0.0137269		0.297	0.03	0.25	0.02	0.211271	0.000380094
PEG113-b-H90-co-A10			0.17	0.03	0.258	0.03	0.265968	0.00328512		0.258	0.03	0.238	0.02	0.193802	0.0432412
PEG113-b-A90-co-M10			0.163	0.04	0.251	0.03	0.260006	0.0299248		0.251	0.03	0.231	0.04	0.159454	0.0430809
PEG113-b-A90-co-F10			0.149	0.03	0.243	0.07	0.2719	0.0486059		0.243	0.07	0.231	0.02	0.167364	0.0892377
PEG113-b-A90-co-X10			#N/A	0.14	#N/A	0.11	0.259868	0.00852844		#N/A	0.11	0.225	0.01	0.174051	0.102298
A90-co-H10			0.166	0.01	0.25	0.01	0.251699	0.0436492		0.25	0.01	0.224	0	0.169155	0.00053481
PEG113-b-H80-co-C20			0.172	0.01	0.254	0	0.275734	0.0161169		0.254	0	0.236	0.03	0.20323	0.0524368
PEG113-b-H80-co-A20			0.163	0.01	0.282	0.01	0.26636	0.00255799		0.282	0.01	0.236	0.03	0.213841	0.00135858
PEG113-b-H80-co-Q20			0.181	0.04	0.412	0.05	0.327079	0.0513717		0.412	0.05	0.28	0.01	0.248965	0.0100135
PEG113-b-H80-co-S20			0.156	0.03	0.273	0.01	0.259084	0.0076194		0.273	0.01	0.245	0.01	0.196221	0.0353247
PEG113-b-A80-co-C20			0.16	0.03	0.23	0.02	0.262632	0.0261156		0.23	0.02	0.237	0.03	0.162956	0.00321541
PEG113-b-A80-co-H20			0.16	0.03	0.24	0.04	0.262635	0.0242484		0.24	0.04	0.231	0.03	0.177829	0.0133077
PEG113-b-A80-co-Q20			0.148	0.08	0.266	0.03	0.281881	0.0179192		0.266	0.03	0.226	0.02	0.178279	0.0239972
A80-co-S20			0.16	0.03	0.264	0.05	0.243394	0.0228835		0.264	0.05	0.208	0.01	0.154751	0.0173999
PEG113-b-H75-co-C20-co-M5			0.176	0.03	0.27	0.03	0.255791	0.0427409		0.27	0.03	0.242	0.01	0.206137	0.00915237
PEG113-b-H75-co-C20-co-F5			0.167	0.06	0.261	0.03	0.263817	0.021825		0.261	0.03	0.23	0.01	0.224435	0.00273392
PEG113-b-H75-co-C20-co-X5			0.157	0.07	0.268	0.04	0.270842	0.00578699		0.268	0.04	0.248	0.02	0.224726	0.0178138
PEG113-b-H75-co-C20-co-A5			0.164	0.06	0.242	0.04	0.266093	0.0592746		0.242	0.04	0.236	0.01	0.198072	0.0323051
PEG113-b-A75-co-C20-co-M5			0.155	0	0.229	0.02	0.25385	0.0200824		0.229	0.02	0.233	0.02	0.157044	0.00519298
PEG113-b-A75-co-C20-co-F5			0.158	0.02	0.23	0.04	0.251857	0.0749678		0.23	0.04	0.223	0.02	0.180214	0.00566076
PEG113-b-A75-co-C20-co-X5			0.147	0	0.227	0.02	0.262545	0.036061		0.227	0.02	0.222	0.02	0.161873	0.0443692
PEG113-b-A75-co-C20-co-A5			0.177	0.04	0.242	0	0.250961	0.0446389		0.242	0	0.222	0	0.211438	0.0214145
PEG113-b-H70-co-C20-co-M10			0.182	0.04	0.287	0.02	0.241054	0.0201599		0.287	0.02	0.242	0.02	0.223544	0.0226381
PEG113-b-H70-co-C20-co-F10			0.17	0.02	0.288	0.01	0.246069	0.0158617		0.288	0.01	0.237	0.01	0.229855	0.0009711
PEG113-b-H70-co-C20-co-X10			0.165	0.01	0.295	0.03	0.248391	0.00363971		0.295	0.03	0.246	0.03	0.22968	0.0480722
PEG113-b-H70-co-C20-co-A10			0.17	0.06	0.269	0.03	0.242895	0.00485128		0.269	0.03	0.26	0.02	0.224059	0.00976188
PEG113-b-A70-co-C20-co-M10			0.15	0.02	0.242	0.01	0.236174	0.0326248		0.242	0.01	0.214	0.01	0.166301	0.0454793
PEG113-b-A70-co-C20-co-F10			#N/A	0.13	0.231	0.03	0.240559	0.0276242		0.231	0.03	0.223	0.03	0.157984	0.0224449
PEG113-b-A70-co-C20-co-X10			0.141	0.06	0.224	0.01	0.246357	0.0102347		0.224	0.01	0.21	0.05	0.151183	0.0178544
PEG113-b-A70-co-C20-co-A10			#N/A	0.38	0.243	0	0.228143	0.0130765		0.243	0	0.23	0.01	0.225074	0.00605494
PEG113-b-H60-co-C40			0.181	0.01	0.286	0.06	0.248968	0.0927643		0.286	0.06	0.242	0.05	0.245853	0.00913979
PEG113-b-H60-co-A40			0.167	0	0.308	0.04	0.24743	0.0103413		0.308	0.04	0.236	0	#N/A	0.14035
PEG113-b-H60-co-Q40			0.18	0.02	0.454	0.03	0.274607	0.0198809		0.454	0.03	0.258	0.05	0.229338	0.0128711
PEG113-b-H60-co-S40			0.151	0	0.267	0.02	0.222107	0.0536163		0.267	0.02	0.25	0.04	0.176053	0.0427836
PEG113-b-A60-co-C40			0.159	0.02	0.29	0.01	0.226335	0.0938349		0.29	0.01	0.226	0.03	0.157597	0.0567977
PEG113-b-A60-co-H40			0.156	0.04	0.288	0.02	0.250484	0.00638013		0.288	0.02	0.217	0.01	0.182019	0.00250024
PEG113-b-A60-co-Q40			0.168	0.03	0.402	0.08	0.260731	0.0276912		0.402	0.08	0.231	0.03	0.195047	0.0488008
PEG113-b-A60-co-S40			#N/A	0.12	0.242	0.02	0.229988	0.0467043		0.242	0.02	0.215	0.02	0.154975	0.0811493
H80-co-Q20			0.218785	0.015265	0.341524	0.077299	0.323547	0.053102		0.341524	0.077299	0.326623	0.0701656	0.366018	0.0648914
H80-co-N20			0.171562	0.0694337	0.217786	0.00800297	0.226378	0.0244001		0.217786	0.00800297	0.235164	0.0144516	0.237752	0.0127497
H80-co-D20			0.178217	0.00237549	0.237241	0.0203148	0.230561	0.0278955		0.237241	0.0203148	0.241341	0.0714686	0.23212	0.0145159
H80-co-S20			0.158292	0.0323491	0.1479	0.00573617	0.219326	0.0454179		0.1479	0.00573617	0.152947	0.0326156	#N/A	0.109033
A80-co-Q20			#N/A	0.141337	0.181372	0.0103752	0.231964	0.00103985		0.181372	0.0103752	0.182298	0.00934874	0.203165	0.0726635
A80-co-N20			0.163235	0.0098484	0.175297	0.00977835	0.233969	0.00786189		0.175297	0.00977835	0.182374	0.0858895	0.194358	0.0609172
A80-co-D20			#N/A	0.189195	#N/A	0.116587	0.236011	0.0090708		#N/A	0.116587	0.220123	0.0212519	0.209443	0.0181641
A80-co-S20			#N/A	0.228222	0.171884	0.0103965	0.219993	0.0244643		0.171884	0.0103965	0.179107	0.0526496	0.174912	0.0492408
H60-co-Q20-co-C20			0.173607	0.0699861	0.24397	0.00102262	0.239967	0.0703238		0.24397	0.00102262	0.247151	0.0721195	0.238977	0.003473
H60-co-N20-co-C20			0.178799	0.0111316	0.210912	0.0199641	0.239067	0.00307737		0.210912	0.0199641	0.216611	0.002456	0.228441	0.0272111
H60-co-D20-co-C20			0.17356	0.0487521	0.222473	0.0521838	0.233718	0.010371		0.222473	0.0521838	0.235761	0.0112854	0.226997	0.0192306
H60-co-S20-co-C20			#N/A	0.210899	0.160907	0.00571039	0.225069	0.0242057		0.160907	0.00571039	0.162877	0.0795101	0.165938	0.0806991
A60-co-Q20-co-C20			0.163249	0.0448061	0.179885	0.042313	0.242323	0.0427284		0.179885	0.042313	0.206644	0.0664605	0.204267	0.0803707
A60-co-N20-co-C20			0.165423	0.0341177	0.185068	0.0546539	0.23111	0.0174522		0.185068	0.0546539	0.179081	0.067988	0.206913	0.0247783
A60-co-D20-co-C20			0.17467	0.0358698	0.200789	0.0452015	0.247249	0.0173317		0.200789	0.0452015	0.202106	0.0188633	0.206626	0.0570288
A60-co-S20-co-C20			0.159841	0.00589698	0.14277	0.0563143	0.220918	0.0614302		0.14277	0.0563143	0.15181	0.0855647	0.152744	0.0211559
H60-co-Q40			0.241144	0.0166417	0.375892	0.051925	0.368442	0.023564		0.375892	0.051925	0.371906	0.0941876	0.393309	0.0886342
H60-co-N40			0.174178	0.0235476	0.210867	0.0160284	0.238577	0.0185961		0.210867	0.0160284	0.20471	0.0110014	0.226144	0.0480246
H60-co-D40			0.158279	0.0787901	0.205278	0.0605366	0.236594	0.00479565		0.205278	0.0605366	0.200737	0.0654881	0.188809	0.0653342
H60-co-S40			0.143044	0.0998919	#N/A	0.153624	0.225968	0.00901834		#N/A	0.153624	0.1653	0.0566584	0.173094	0.0367101
A60-co-Q40			0.250365	0.038574	0.412894	0.0605863	0.397692	0.0594411		0.412894	0.0605863	0.402039	0.0352391	0.485815	0.0727499
A60-co-N40			0.169588	0.00721726	0.194311	0.00373174	0.239835	0.0241301		0.194311	0.00373174	0.195892	0.00353501	0.197546	0.000365094
A60-co-D40			0.17035	0.0465313	0.188139	0.0868359	0.234803	0.00370587		0.188139	0.0868359	0.19759	0.078628	0.204696	0.0909519
A60-co-S40			0.15855	0.0174462	0.149507	0.0176846	0.22832	0.0300027		0.149507	0.0176846	#N/A	0.128322	0.153814	0.00769931
H50-co-Q40-co-F10			0.255508	0.0271585	0.378946	0.0056698	0.339963	0.0105097		0.378946	0.0056698	#N/A	0.106305	0.440143	0.0366797
H50-co-N40-co-Q10			0.2185	0.0197907	0.278654	0.0164293	0.28485	0.00189166		0.278654	0.0164293	0.274897	0.0210849	0.299624	0.00101388
H50-co-D40-co-F10			0.161632	0.0149726	#N/A	0.137229	0.235548	0.0335317		#N/A	0.137229	0.196524	0.0823566	0.184325	0.0376934
H50-co-S40-co-F10			0.156551	0.0768377	0.140367	0.0653274	0.224469	0.00805716		0.140367	0.0653274	0.14616	0.0677428	0.153457	0.0587049
A50-co-Q40-co-F10			0.259235	0.00329533	0.346993	0.0446381	0.388495	0.0149605		0.346993	0.0446381	0.341979	0.0307073	0.437582	0.0457679
A50-co-N40-co-Q10			0.224971	0.00139047	0.345935	0.0832079	0.333571	0.0227873		0.345935	0.0832079	0.350408	0.0221058	0.364605	0.0536467
A50-co-D40-co-F10			0.162931	0.0348738	0.199237	0.0626568	0.233559	0.0189901		0.199237	0.0626568	0.208296	0.0574235	0.188376	0.0560639
A50-co-S40-co-F10			0.155302	0.00586531	0.151236	0.0596379	0.218466	0.0212432		0.151236	0.0596379	0.149315	0.0580426	0.161691	0.0725817
H40-co-Q40-co-C20			0.206816	0.0332625	0.252886	0.0231305	0.266687	0.0230164		0.252886	0.0231305	0.252833	0.0258574	0.257758	0.0446884
H40-co-N40-co-C20			0.172925	0.0191228	0.212671	0.000470875	0.230732	0.0273339		0.212671	0.000470875	0.220057	0.027954	0.235039	0.00284631
H40-co-D40-co-C20			0.163972	0.00192106	0.229417	0.038225	0.241688	0.0278786		0.229417	0.038225	0.218254	0.0698319	0.214819	0.0167202
H40-co-S40-co-C20			0.164445	0.0042747	0.160044	0.0146806	0.221166	0.00240465		0.160044	0.0146806	0.164212	0.0646294	0.161001	0.0719396
A40-co-Q40-co-C20			0.196942	0.0151099	0.278705	0.00586782	0.304754	0.0413442		0.278705	0.00586782	0.274805	0.0307572	0.313094	0.0450646
A40-co-N40-co-C20			0.169666	0.0028843	0.197885	0.0135131	0.23601	0.0021767		0.197885	0.0135131	0.188914	0.0467157	0.2184	0.0213474
A40-co-D40-co-C20			0.152235	0.0138326	0.198991	0.00236898	0.248918	0.00487264		0.198991	0.00236898	0.22084	0.0887284	0.197542	0.0629928
A40-co-S40-co-C20			#N/A	0.117737	0.14119	0.0282106	0.212081	0.0210149		0.14119	0.0282106	0.145155	0.0836411	0.153169	0.0413872
H40-co-Q40-co-F10 -co-C10			0.209678	0.00429332	0.325136	0.035126	0.254561	0.0442026		0.325136	0.035126	0.329459	0.0377065	0.355463	0.035588
H40-co-N40-co-Q10 -co-C10			0.176785	0.0283067	0.202644	0.0745559	0.233773	0.0177023		0.202644	0.0745559	0.211196	0.0200919	0.219399	0.0303182
H40-co-D40-co-F10 -co-C10			0.162686	0.0502414	0.214418	0.0232093	0.24199	0.013134		0.214418	0.0232093	0.22222	0.040976	0.208581	0.0661205
H40-co-S40-co-F10 -co-C10			0.163472	0.0268249	#N/A	0.106462	0.215082	0.0474837		#N/A	0.106462	0.138872	0.0238084	0.156411	0.0458761
A40-co-Q40-co-F10 -co-C10			0.25254	0.0326239	0.405231	0.0174874	0.360163	0.0452076		0.405231	0.0174874	0.383994	0.00160591	0.509253	0.0321203
A40-co-N40-co-Q10 -co-C10			0.174888	0.0121784	0.200225	0.00959762	0.248871	0.00274328		0.200225	0.00959762	0.201601	0.0191333	0.233872	0.0855834
A40-co-D40-co-F10 -co-C10			0.183347	0.280059	0.169229	0.0847688	0.229954	0.0275454		0.169229	0.0847688	0.203983	0.0426252	0.17805	0.00393088
A40-co-S40-co-F10 -co-C10			0.16185	0.00406173	0.131131	0.0782501	0.213288	0.00483006		0.131131	0.0782501	0.144538	0.0314953	0.158289	0.00935871
PEG113-b-H80-co-Q20			0.246514	0.0518348	0.39361	0.103359	0.359072	0.0402089		0.39361	0.103359	#N/A	0.149238	#N/A	0.247618
PEG113-b-H80-co-N20			0.177063	0.00226357	0.24344	0.0643192	0.233754	0.0180632		0.24344	0.0643192	0.253169	0.0190033	0.247686	0.00845646
PEG113-b-H80-co-D20			0.174219	0.0597861	0.289631	0.0120206	0.243528	0.0223618		0.289631	0.0120206	0.268635	0.0234009	0.258399	0.0625701
PEG113-b-H80-co-S20			0.167709	0.0342261	0.214698	0.0153801	0.23314	0.0162566		0.214698	0.0153801	0.240945	0.00109272	0.207111	0.0254631
PEG113-b-A80-co-Q20			0.291335	0.0275179	0.491712	0.0755013	0.443229	0.0229276		0.491712	0.0755013	#N/A	0.15665	#N/A	0.27762
PEG113-b-A80-co-N20			0.173436	0.0147856	0.222443	0.0056896	0.246269	0.00449063		0.222443	0.0056896	0.229545	0.0217102	0.233781	0.00630734
PEG113-b-A80-co-D20			0.179408	0.0563949	0.269042	0.00360355	0.251301	0.00527113		0.269042	0.00360355	0.258901	0.00452689	0.240804	0.0292922
PEG113-b-A80-co-S20			0.157214	0.0268297	0.211345	0.0628385	0.225732	0.0353686		0.211345	0.0628385	0.226025	0.00412801	0.21479	0.0702301
PEG113-b-H60-co-Q20-co-C20			0.196343	0.085158	0.280513	0.0011144	0.253683	0.0291018		0.280513	0.0011144	0.28527	0.0201781	0.289843	0.0252611
PEG113-b-H60-co-N20-co-C20			0.180436	0.0059876	0.229289	0.0745502	0.23441	0.0328136		0.229289	0.0745502	0.244849	0.0418897	0.2627	0.0321789
PEG113-b-H60-co-D20-co-C20			0.169509	0.00321495	0.241044	0.0241118	0.241301	0.000537892		0.241044	0.0241118	0.252971	0.00331589	0.254476	0.0259669
PEG113-b-H60-co-S20-co-C20			0.171456	0.0533691	0.185321	0.000914982	0.232714	0.00476277		0.185321	0.000914982	0.207201	0.0514557	0.191558	0.0480906
PEG113-b-A60-co-Q20-co-C20			0.200229	0.00625546	0.273378	0.0284395	0.289868	0.0319596		0.273378	0.0284395	0.27672	0.0198576	0.27994	0.0466314
PEG113-b-A60-co-N20-co-C20			0.17393	0.0110877	0.210303	0.0350956	0.236231	0.00264032		0.210303	0.0350956	0.201488	0.043312	0.246216	0.0273835
PEG113-b-A60-co-D20-co-C20			0.182311	0.050523	0.297979	0.0235835	0.295219	0.00953905		0.297979	0.0235835	0.316518	0.0138329	0.271563	0.101901
PEG113-b-A60-co-S20-co-C20			0.156788	0.0303986	0.193247	0.0390403	0.222371	0.00976388		0.193247	0.0390403	#N/A	0.137915	#N/A	0.107395
PEG113-b-H60-co-Q40			0.272598	0.0121056	0.448448	0.0179334	0.390841	0.0448005		0.448448	0.0179334	0.44203	0.0379454	0.46094	0.0142335
PEG113-b-H60-co-N40			0.176758	0.0140091	0.242383	0.017974	0.243287	0.0342587		0.242383	0.017974	0.247753	0.0268334	0.244971	0.0390988
PEG113-b-H60-co-D40			0.161937	0.0254717	#N/A	0.1123	0.245545	0.101459		#N/A	0.1123	0.234126	0.0228407	0.212486	0.0334588
PEG113-b-H60-co-S40			0.160257	0.0264847	0.183327	0.00515478	0.225899	0.0136765		0.183327	0.00515478	0.22098	0.00495078	0.185233	0.0660181
PEG113-b-A60-co-Q40			#N/A	0.120574	0.524767	0.0318995	0.440635	0.045486		0.524767	0.0318995	0.49899	0.0447768	0.550325	0.0464835
PEG113-b-A60-co-N40			0.166578	0.0479868	0.218067	0.00197246	0.244778	0.0288528		0.218067	0.00197246	0.229982	0.0469581	0.236041	0.0262027
PEG113-b-A60-co-D40			0.180113	0.0380566	0.228073	0.0251347	0.250973	0.0156155		0.228073	0.0251347	0.257331	0.0596085	0.244005	0.0243854
PEG113-b-A60-co-S40			0.156582	0.000722392	0.194252	0.0541965	0.222399	0.0193085		0.194252	0.0541965	0.225212	0.056821	0.189571	0.053056
PEG113-b-H50-co-Q40-co-F10			0.293219	0.025318	0.451725	0.0289649	0.405413	0.0487337		0.451725	0.0289649	#N/A	0.106143	0.514961	0.01701
PEG113-b-H50-co-N40-co-Q10			0.2174	0.0325577	0.379858	0.0525999	0.338653	0.0330332		0.379858	0.0525999	0.391737	0.00119869	0.420967	0.03846
PEG113-b-H50-co-D40-co-F10			0.154774	0.0736123	0.22096	0.0434293	0.222225	0.0362144		0.22096	0.0434293	0.21798	0.0775997	0.192084	0.0171414
PEG113-b-H50-co-S40-co-F10			0.157781	0.0680054	0.174823	0.0219744	0.219574	0.00358857		0.174823	0.0219744	0.182182	0.018331	0.188637	0.00694034
PEG113-b-A50-co-Q40-co-F10			0.315378	0.00392696	0.489312	0.0370383	0.464082	0.0392211		0.489312	0.0370383	0.498364	0.00381608	0.585163	0.0217726
PEG113-b-A50-co-N40-co-Q10			0.243895	0.00659445	0.45908	0.0159078	0.396551	0.0446372		0.45908	0.0159078	0.461326	0.0393444	0.505282	0.0215977
PEG113-b-A50-co-D40-co-F10			0.167885	0.0302318	0.22116	0.0403551	0.241805	0.0353732		0.22116	0.0403551	0.256133	0.037547	0.216543	0.0128973
PEG113-b-A50-co-S40-co-F10			0.15293	0.0231598	0.180225	0.0114126	0.209004	0.0163751		0.180225	0.0114126	0.203688	0.0589625	0.195988	0.100627
PEG113-b-H40-co-Q40-co-C20			0.227687	0.00418692	0.330233	0.0716468	0.297849	0.0134069		0.330233	0.0716468	0.332432	0.0379086	0.344137	0.0836593
PEG113-b-H40-co-N40-co-C20			0.17505	0.00106125	0.241631	0.0608144	0.239839	0.00418286		0.241631	0.0608144	0.248862	0.000161869	0.272293	0.00433022
PEG113-b-H40-co-D40-co-C20			0.168199	0.0266649	0.256289	0.0252633	0.231127	0.0593375		0.256289	0.0252633	0.272615	0.0190318	0.236509	0.0403148
PEG113-b-H40-co-S40-co-C20			0.156441	0.0208909	0.180182	0.0252338	0.209835	0.00827743		0.180182	0.0252338	0.208768	0.0624793	0.195866	0.0161349
PEG113-b-A40-co-Q40-co-C20			0.248198	0.0374404	0.36219	0.0239144	0.328892	0.00488198		0.36219	0.0239144	0.345102	0.0590832	0.369811	0.0544398
PEG113-b-A40-co-N40-co-C20			0.16451	0.0798117	0.218689	0.0588369	0.225236	0.00973946		0.218689	0.0588369	0.221225	0.0777519	0.250237	0.0529347
PEG113-b-A40-co-D40-co-C20			0.159388	0.0075946	0.235896	0.0295953	0.237965	0.0442009		0.235896	0.0295953	0.254567	0.0368194	0.208283	0.0882821
PEG113-b-A40-co-S40-co-C20			0.150058	0.0299318	0.18582	0.0341888	0.204081	0.0362008		0.18582	0.0341888	0.210292	0.0607534	0.191222	0.021669
PEG113-b-H40-co-Q40-co-F10 -co-C10			0.275872	0.00206513	0.440598	0.0261511	0.326839	0.027913		0.440598	0.0261511	0.434105	0.0462218	0.508904	0.0298328
PEG113-b-H40-co-N40-co-Q10 -co-C10			0.178441	0.0334055	0.286835	0.0319934	0.233648	0.0520217		0.286835	0.0319934	0.286865	0.0611458	0.312675	0.0533278
PEG113-b-H40-co-D40-co-F10 -co-C10			0.15255	0.00190223	0.245396	0.0580573	0.201726	0.0526436		0.245396	0.0580573	0.266461	0.00803345	0.200275	0.0327189
PEG113-b-H40-co-S40-co-F10 -co-C10			0.154653	0.0449805	#N/A	0.109554	0.187055	0.0371386		#N/A	0.109554	0.189961	0.0203236	0.183247	0.0199039
PEG113-b-A40-co-Q40-co-F10 -co-C10			0.295864	0.0754042	0.423471	0.01188	0.432371	0.0368378		0.423471	0.01188	0.433877	0.0326667	0.502461	0.0189972
PEG113-b-A40-co-N40-co-Q10 -co-C10			0.176069	0.00745666	0.315188	0.0475268	0.266259	0.00760785		0.315188	0.0475268	0.314205	0.00399041	0.310717	0.0598788
PEG113-b-A40-co-D40-co-F10 -co-C10			0.151862	0.0147013	0.225266	0.0943819	0.217309	0.00540374		0.225266	0.0943819	0.243647	0.0387325	0.207324	0.0784615
PEG113-b-A40-co-S40-co-F10 -co-C10			0.149248	0.0128574	0.157715	0.0951016	0.178378	0.0489728		0.157715	0.0951016	0.169524	0.0850938	0.161394	0.0286283

## Sheet: figure 5
			MnP		GOx		Cas		Uri		BSA		Tyr		CAn		Lys
			6.32 uM	16 eq	0.5 uM	4 eq	9.96 uM	16 eq	7.38 uM	16 eq	3.61 uM	8 eq	9.41 uM	16 eq	7.11 uM	16 eq.	15.4 uM	16 eq
POLYMER NAME			FRET	Error	FRET	Error	FRET	Error	FRET	Error	FRET	Error	FRET	Error	FRET	Error	FRET	Error
poly(H₁₀₀)					0.28	0.01	0.276644	0.0280313	0.263104	0.00348036	0.0779897	0.0254053	0.0774301	0.0132391	0.214801	0.0165768	0.0720269	0.0285426
poly(H₉₀-co-D₁₀)					0.575	0	0.291913	0.0520364	0.285114	0.0182613	0.0774259	0.00996797	0.0764055	0.0129093	0.218894	0.0462371	0.0705801	0.0118618
poly(H₈₀-co-D₂₀)					0.602	0.02	0.329922	0.0245485	0.347293	5.62381e-07	0.0787476	0.00488019	0.0784553	0.00607575	0.221635	0.0495964	0.070899	0.0157948
poly(H₅₀-co-D₅₀)					0.61	0	0.379149	0.00295609	0.360795	0.00649252	0.0775663	0.00832404	0.0761502	0.00277236	0.220394	0.00398398	0.0703599	0.00310893
poly(H₄₀-co-D₆₀)					0.63	0	0.358853	0.00334744	0.357791	0.00749114	0.0785084	0.0109068	0.0764928	0.0206017	0.206828	0.0215453	0.069236	0.00855801
poly(A₉₀-co-D₁₀)					0.465	0.03	0.275824	0.0501433	0.254348	0.020487	0.0762032	0.00984751	0.0669574	0.0248001	0.174933	0.0891757	0.0692013	0.00372451
poly(A₈₀-co-D₂₀)			0.122045	0.00397348	0.569	0.03	0.297456	0.0350926	0.29963	0.0454496	0.0785321	0.0374519	0.0696711	0.00178423	0.213756	0.0828001	0.0677658	0.0152632
poly(A₄₀-co-D₆₀)			0.144869	0.00996134	0.619	0.01	0.405958	0.040996	0.344227	0.00785155	0.0842774	0.0536346	0.0722886	0.0459749	0.186806	0.185298	0.0697172	0.0121771
poly(C₉₀-co-D₁₀)					0.377	0.07	0.376348	0.0290514	0.293396	0.00902863	0.0828659	0.00913381	0.0728592	0.00321599	0.214549	0.0671696	0.191426	0.0209516
poly(C₈₀-co-D₂₀)					0.376	0.01	0.362789	0.0262933	0.298716	0.0165207	0.083257	0.00338964	0.0753453	0.020805	0.213916	0.0677052	0.133013	0.0214649
poly(C₅₀-co-D₅₀)			0.199385	0.0439161	0.377	0.09	0.358133	0.0308712	0.298053	0.00306132	0.0779553	0.00639623	0.074599	0.0114701	0.206375	0.0055819	0.0679093	0.0196493
poly(C₄₀-co-D₆₀)					0.406	0.07	0.424156	0.0513746	0.304224	0.00624026	0.0768265	0.00157582	0.0741178	0.0153613	0.189436	0.0793968	0.0682276	0.00115528
poly(PEG₄₀-co-H₃₅-co-D₂₀-co-M₅)			0.431685	0.0213988	0.381	0.1	0.311453	0.0340702	0.313975	0.00929627	0.0771802	0.0254345	0.0865938	0.0270476	0.23879	0.0132318	0.0730836	0.0126343
poly(PEG₄₀-co-H₃₅-co-D₂₀-co-Y₅)			0.391391	0.126617	0.372	0.09	0.315496	0.0285647	0.29849	0.0307673	0.0803106	0.00196414	0.0855259	0.0360287	0.231494	0.0693975	0.0724492	0.0213968
poly(PEG₄₀-co-H₃₅-co-D₂₀-co-F₅)			0.499249	0.050411	0.467	0.07	0.421372	0.0377229	0.356633	0.0117991	0.0834963	0.0120356	0.0906418	0.0265155	0.275834	0.0173888	0.0730941	0.00897667
poly(PEG₄₀-co-H₃₀-co-D₂₀-co-M₁₀)					0.374	0.11	0.34972	0.0520452	0.286243	0.00371005	0.0825742	0.0114068	0.0909685	0.0407943	0.223182	0.00993227	0.0718973	0.00632548
poly(C₉₀-co-A₁₀)					0.359	0.06	0.429521	0.0429016	0.273538	0.00367891	0.0837279	0.00551159	0.0728841	0.0423305	0.188865	0.0452182	0.24382	0.0119265
poly(C₈₀-co-A₂₀)					0.338	0.06	0.401049	0.0293306	0.281463	0.0101518	0.0836344	0.00939765	0.072426	0.0217061	0.191154	0.0795262	0.230639	0.0357684
poly(C₅₀-co-A₅₀)					0.29	0	0.315457	0.0131418	0.258771	0.0128864	0.0762834	0.00736483	0.0725586	0.0196428	0.15402	0.0261154	0.12214	0.0274189
poly(C₄₀-co-A₆₀)			0.192642	0.046277	0.258	0.05
poly(C₉₀-co-H₁₀)					0.311	0.03	0.471843	0.0240155	0.296307	0.0135823	0.0933442	0.00868022	0.0770864	0.00741765	0.192248	0.117037	0.248736	0.00494573
poly(C₈₀-co-H₂₀)					0.283	0.02	0.562849	0.0389948	0.299311	0.0194141	0.09311	0.00611203	0.0827101	0.0511163	0.195554	0.000750648	0.241018	0.0415542
poly(C₅₀-co-H₅₀)					0.334	0.06	0.284057	0.0217196	0.250104	0.0110042	0.0753674	0.00800532	0.0705128	0.0205801	0.156497	0.0590184	0.088284	0.0228192
poly(C₄₀-co-H₆₀)					0.342	0.08	0.463379	0.063017	0.268986	0.0318026	0.081788	0.0435469	0.0816962	0.0437563	0.155184	0.187801	0.175539	0.0245231
poly(A₇₅-co-D₂₀-co-C₅)			0.126151	0.0651471	0.482	0.01	0.283438	0.00283635	0.25456	0.0119609	0.076739	0.00739115	0.0692286	0.00758085	0.150317	0.0199054	0.0708932	0.0321627
poly(A₇₅-co-D₂₀-co-M₅)			0.165675	0.0341055	0.558	0.05	0.295455	0.0105021	0.300797	0.0124747	0.0831163	0.0845067	0.0717167	0.00909233	0.182503	0.0191897	0.068655	0.000314718
poly(A₇₅-co-D₂₀-co-Y₅)					0.58	0.01	0.313283	0.0122191	0.320042	0.0191722	0.0775202	0.0203123	0.0705775	0.0129112	0.181817	0.0852148	0.0689148	0.00875352
poly(A₇₅-co-D₂₀-co-F₅)					0.681	0	0.544543	0.0425344	0.474409	0.00200956	0.114363	0.018336	0.081358	0.0375243	0.337922	0.0531878	0.0725255	0.00298603
poly(A₇₀-co-D₂₀-co-C₁₀)					0.597	0.02	0.280773	0.0114789	0.251696	0.00637508	0.0774007	0.025094	0.0717325	0.00256705	0.151992	0.0104	0.0696067	0.0145804
poly(A₇₀-co-D₂₀-co-M₁₀)			0.176867	0.0400459	0.549	0.03	0.315605	0.0386751	0.311378	0.00569401	0.0767385	0.0213103	0.0739355	0.00460024	0.160455	0.1605	0.0703811	0.00174369
poly(A₇₀-co-D₂₀-co-Y₁₀)					0.667	0.02	0.563609	0.0406727	0.42682	0.00647821	0.101512	0.01577	0.0809891	0.0123854	0.230458	0.0582009	0.0709057	0.00475929
poly(A₇₀-co-D₂₀-co-F₁₀)					0.726	0.02	0.672172	0.0428593	0.505722	0.0205713	0.13094	0.0313941	0.0973838	0.0884807	0.341297	0.0627723	0.0812405	0.0732831
poly(H₇₅-co-D₂₀-co-C₅)					0.503	0.04	0.284398	0.00382059	0.297439	0.00151058	0.0777512	0.00768343	0.07368	0.0128582	0.206945	0.0489216	0.0688646	0.0098774
poly(H₇₅-co-D₂₀-co-M₅)					0.567	0.02	0.301812	0.000492709	0.321796	0.01114	0.079221	1.92775e-06	0.0766439	0.0349334	0.215529	0.00710413	0.0687127	0.00124034
poly(H₇₅-co-D₂₀-co-Y₅)					0.634	0.02	0.354527	0.0136761	0.390375	0.00193612	0.0818759	0.0206885	0.077591	0.0102265	0.248328	0.0483485	0.06931	0.0080538
poly(H₇₅-co-D₂₀-co-F₅)					0.688	0.03	0.528852	0.0313387	0.488001	7.89656e-05	0.10621	0.00317582	0.0791258	0.0128265	0.43017	0.036333	0.0711099	0.0147626
poly(H₇₀-co-D₂₀-co-C₁₀)					0.585	0.02	0.314106	0.0284559	0.284692	0.00550647	0.0789978	0.0151498	0.0781249	0.025822	0.187416	0.0757589	0.0703591	0.0277165
poly(H₇₀-co-D₂₀-co-M₁₀)			0.272144	0.0348218	0.566	0.04	0.369015	0.0512053	0.393277	0.0466078	0.0833241	0.00817755	0.0797641	0.0341593	0.227409	0.0249574	0.0699934	0.0267922
poly(H₇₀-co-D₂₀-co-Y₁₀)			0.350242	0.0458815	0.679	0.01	0.644975	0.0317591	0.484966	0.00637664	0.109632	0.0187861	0.0822639	0.0342929	0.406705	0.038359	0.0723077	0.00193834
poly(H₇₀-co-D₂₀-co-F₁₀)					0.212	0	0.517717	0.0536103	0.485555	0.0163665	0.104831	0.0107755	0.0780442	0.0261824	0.335239	0.0367035	0.0700861	0.00670586
poly(A75-co-D20-co-C5)			0.142116	0.0591514	0.383	0.09
poly(A75-co-D20-co-M5)			0.172338	0.0562129	0.418	0.02
poly(A70-co-D20-co-C10)			0.153719	0.02811	0.386	0.12
poly(H75-co-D20-co-C5)					0.39	0.08
poly(H75-co-D20-co-M5)					0.447	0.04
poly(H70-co-D20-co-C10)					0.314	0.07
poly(PEG₄₀-co-H₃₀-co-D₂₀-co-Y₁₀)			0.485535	0.000147823	0.34	0.05	0.363174	0.0306861	0.313509	0.030544	0.0860285	0.0105239	0.0895346	0.0447915	0.24478	0.00750829	0.0728962	0.00529033
poly(PEG₄₀-co-H₃₀-co-D₂₀-co-F₁₀)					0.411	0.03	0.444525	0.0373034	0.407332	0.0130163	0.093319	0.0337186	0.0855018	0.0249327	0.301314	0.00887732	0.0717914	7.25172e-07
poly(PEG₄₀-co-A₆₀)			0.403974	0.0752378	0.356	0.08	0.277982	0.0283419	0.264481	0.0264562	0.0758233	0.00906119	0.0768093	0.0233848	0.181864	0.0399653	0.0694642	0.00768411
poly(PEG₄₀-co-A₅₀-co-D₁₀)			0.486044	0.0483189	0.397	0.05	0.292939	0.0232736	0.270616	0.0126426	0.0784464	0.00368141	0.0807466	0.0286926	0.191739	0.0269947	0.0696952	0.00107887
poly(PEG₄₀-co-A₄₀-co-D₂₀)					0.419	0.03	0.316924	0.0413171	0.284707	0.0267944	0.081297	0.00607298	0.0828431	0.0295195	0.234222	0.0730086	0.0703437	0.0047641
poly(PEG₄₀-co-A₁₀-co-D₅₀)					0.421	0.04	0.376497	0.035886	0.342777	0.0139206	0.0820714	0.0213362	0.0783673	0.00033407	0.234038	0.0364907	0.068649	0.00174071
poly(PEG₄₀-co-H₆₀)			0.447152	0.0194616	0.325	0.13	0.329454	0.0207273	0.276506	0.0107242	0.0811517	0.0067985	0.082508	0.0172659	0.189213	0.0321483	0.0708637	0.00550113
poly(PEG₄₀-co-H₄₀-co-D₂₀)					0.345	0.06	0.374748	0.0303733	0.307695	0.0296572	0.0870228	0.029485	0.0881673	0.0449368	0.218023	0.000938164	0.0730837	0.00333071
poly(PEG₄₀-co-H₁₀-co-D₅₀)					0.382	0.03	0.572461	0.0618862	0.409641	0.0543865	0.0955802	0.0352606	0.0837583	0.049662	0.256103	0.0489548	0.0686896	0.016029
poly(PEG40-co-A30-co-D20-co-C10)					0.337	0.02
poly(PEG₄₀-co-A₃₅-co-D₂₀-co-Y₅)					0.496	0.03	0.32655	0.0278579	0.28997	0.0275258	0.0795716	0.0156868	0.0814986	0.0202135	0.190844	0.122008	0.070174	0.025716
poly(PEG₄₀-co-A₃₅-co-D₂₀-co-F₅)			0.406563	0.0151918	0.589	0	0.371997	0.0574846	0.312701	0.027335	0.079859	0.0141585	0.0819561	0.0195713	0.232813	0.0441981	0.0708571	0.0180589
poly(PEG₄₀-co-A₃₀-co-D₂₀-co-M₁₀)			0.495371	0.0156488	0.427	0	0.362983	0.0469201	0.275136	0.000460568	0.0801347	0.00220319	0.0865057	0.0192695	0.198	0.0494485	0.0711988	0.0236667
poly(PEG₄₀-co-A₃₀-co-D₂₀-co-Y₁₀)			0.483927	0.0133799	0.39	0.03	0.350925	0.0329925	0.291506	0.029973	0.0825381	0.0130368	0.0852485	0.0370009	0.211481	0.0107117	0.0714418	0.046416
poly(PEG₄₀-co-A₃₀-co-D₂₀-co-F₁₀)			0.449212	0.0118118	0.518	0.02	0.406806	0.0350338	0.385293	0.0238092	0.0884411	0.0243638	0.0819073	0.026938	0.257574	0.0829202	0.0691419	0.00308608
poly(PEG₄₀-co-D₆₀)					0.366	0.06	0.503585	0.0510627	0.376391	0.0261611	0.0899632	0.027443	0.0774146	0.0196938	0.259034	0.0227825	0.067317	0.00238098
poly(PEG40-co-H50-co-D10)			0.507589	0.0189166	0.328	0.03	0.302175	0.0399306	0.256002	0.0594095	0.0825881	0.0199487	0.0874076	0.0334556	0.184886	0.0527813	0.0721479	0.00978108
poly(PEG40-co-A20-co-D20-co-C10-co-Y10)			0.440501	0.0183084	0.444	0.05
PEG₄₃-b-PA₁₀₀					0.644	0.01	0.433609	0.01474	0.43464	0.00124573	0.103811	0.0117518	0.0799087	0.00182057	0.398927	0.01172	0.070588	0.00188373
PEG-₄₃-b-P(A₉₀-co-D₁₀)					0.64	0.01	0.50776	0.0022271	0.442731	0.0137228	0.111457	0.00833802	0.079993	0.0169889	0.449008	0.0330103	0.0707168	0.00816369
PEG-₄₃-b-P(A₈₀-co-D₂₀)					0.623	0.02	0.580809	0.0319167	0.436392	0.00168557	0.108715	0.0119381	0.0810335	0.0196501	0.448551	0.0727078	0.0700183	0.00848671
PEG-₄₃-b-P(A₅₀-co-D₅₀)					0.571	0.02	0.588307	0.0179617	0.4351	0.0125452	0.112523	0.000451803	0.0814086	0.0181768	0.440355	0.00854284	0.0699114	0.000272045
PEG-₄₃-b-P(A₄₀-co-D₆₀)					0.6	0.01	0.630764	0.0143124	0.436668	0.0140988	0.12023	0.0237643	0.0818751	0.0216661	0.436092	0.00677139	0.0700084	0.00720491
PEG-₄₃-b-P(D₁₀₀)					0.503	0.09	0.625336	0.0212264	0.420671	0.0121079	0.123522	0.046876	0.0801202	0.0185979	0.430435	0.00586182	0.069312	0.00900515
PEG₄₃-b-PC₁₀₀			0.447467	0.0527579	0.443	0.02	0.762083	0.00238991	0.436012	0.0277729	0.160817	0.0487847	0.0903187	0.0480513	0.339002	0.0315773	0.320916	0.0258792
poly(PEG40-co-A20-co-D20-co-C10-co-F10)			0.468868	0.00124395	0.47	0.03
PEG-₄₃-b-P(H₁₀₀)			0.561103	0.015907	0.595	0.02	0.344166	0.0226205	0.402795	0.0051987	0.0873513	0.0100597	0.0861935	0.0132915	0.379498	0.0342376	0.0754726	0.00559505
PEG-₄₃-b-P(H₉₀-co-D₁₀)			0.392588	0.677151	0.619	0	0.376767	0.00584523	0.416499	0.000593072	0.086883	0.00554105	0.0842225	0.0222784	0.400837	0.0143236	0.0736313	0.00816886
PEG-₄₃-b-P(H₈₀-co-D₂₀)					0.6	0.01	0.438556	0.001668	0.419676	0.010543	0.0911208	0.00310146	0.0851148	0.0157204	0.40625	0.0649142	0.0728412	0.0336349
PEG-₄₃-b-P(H₅₀-co-D₅₀)					0.492	0.05	0.504749	0.00732135	0.415015	0.00248626	0.104703	0.00213542	0.0793345	0.0115232	0.409044	0.0563156	0.0707514	0.0116497
PEG-₄₃-b-P(H₄₀-co-D₆₀)					0.601	0.03	0.570325	0.0186976	0.420674	0.00881099	0.112274	0.0243545	0.0833	0.0106947	0.435858	0.041608	0.0711644	0.0264029
poly(PEG40-co-H30-co-D20-co-C10)			0.57961	0.0119352	0.324	0.06
poly(PEG40-co-H20-co-D20-co-C10-co-Y10)			0.562109	0.000967787	0.524	0.05
poly(PEG40-co-H20-co-D20-co-C10-co-Y10)			0.431689	0.0460845	0.536	0.07
PEG-₄₃-b-P(A₉₀-co-C₁₀)					0.572	0.04	0.604348	0.00184549	0.467189	0.00159479	0.0973893	0.00107224	0.0842627	0.0366937	0.404706	0.00474977	0.0734239	0.0113488
PEG-₄₃-b-P(A₈₀-co-C₂₀)			0.271447	0.0482662	0.539	0.04	0.620014	0.0244116	0.448151	0.00588468	0.0987786	0.00901781	0.0880735	0.0308994	0.349326	0.0454861	0.0740941	0.0187946
PEG-₄₃-b-P(A₅₀-co-C₅₀)			0.444618	0.0153685	0.481	0.03	0.524331	0.0157825	0.440599	0.0291597	0.113964	0.00684792	0.0834485	0.0233955	0.321444	0.0333385	0.13438	0.00891685
PEG-₄₃-b-P(A₄₀-co-C₆₀)					0.433	0.02	0.690925	0.0413038	0.446509	0.0126237	0.120059	0.0419977	0.0903554	0.0822354	0.322248	0.00987624	0.197278	0.0132723
PEG-₄₃-b-P(H₉₀-co-C₁₀)			0.604407	0.00797788	0.467	0.05	0.573404	0.0203647	0.423558	0.0242503	0.0907233	0.00375494	0.10034	0.0600114	0.297601	0.00114508	0.0762855	0.0101099
PEG-₄₃-b-P(H₈₀-co-C₂₀)			0.593062	0.00935946	0.37	0.04	0.495576	0.0189332	0.436128	0.0322964	0.0964427	0.0169169	0.0886083	0.0311458	0.290259	0.0044439	0.0865075	0.0215255
PEG-₄₃-b-P(H₅₀-co-C₅₀)			0.403197	0.129243	0.344	0.01	0.738086	0.0262062	0.457461	0.0144627	0.119036	0.0222406	0.10828	0.0773286	0.289886	0.00194551	0.234006	0.0101524
PEG-₄₃-b-P(H₄₀-co-C₆₀)					0.332	0.03	0.671014	0.0296561	0.444283	0.0517548	0.124723	0.0260366	0.0844532	0.0825236	0.26233	0.0331007	0.261207	0.0330999
PEG43-b-P(A40-co-D50-co-C10)					0.659	0
PEG43-b-P(A30-co-D50-co-C20)					0.633	0.01
PEG43-b-P(A20-co-D50-co-C30)					0.632	0.01
PEG43-b-P(H40-co-D50-co-C10)			0.435929	0.101582	0.645	0
PEG43-b-P(H30-co-D50-co-C20)			0.42742	0.00461083	0.607	0.01
PEG43-b-P(H20-co-D50-co-C30)			0.471553	0.0180264	0.599	0.01
poly(A₄₀-co-C₆₀)					0.257	0.1	0.319061	0.0239823	0.25431	0.0142786	0.0764944	0.0119781	0.072652	0.0144656	0.144559	0.0401189	0.17936	0.0137998
poly(C₁₀₀)_₂					0.288	0.1	0.429648	0.0239424	0.285511	0.00687759	0.0859432	0.00418317	0.0721776	0.00638478	0.231474	0.025806	0.230759	0.0113824
